# Supplementary material for: Structural Analysis of The OXA-48 Carbapenemase Bound to A “Poor” Carbapenem Substrate, Doripenem
Source: Antibiotics (Basel). 2019 Sep 11;8(3):145. doi: 10.3390/antibiotics8030145 (PMC6783824; doi:10.3390/antibiotics8030145)
Supplement: Supplementary file 1 [file antibiotics-08-00145-s001.pdf]

## Supplemental information

### Structural analysis of the OXA-48 carbapenemase bound to a “poor” carbapenem substrate, doripenem

Krisztina M. Papp-Wallace<sup>1-3\*,#</sup>, Vijay Kumar<sup>1,#</sup>, Elise T. Zeiser<sup>2</sup>, Scott A. Becka<sup>2</sup>, and Focco van den Akker<sup>1\*</sup>

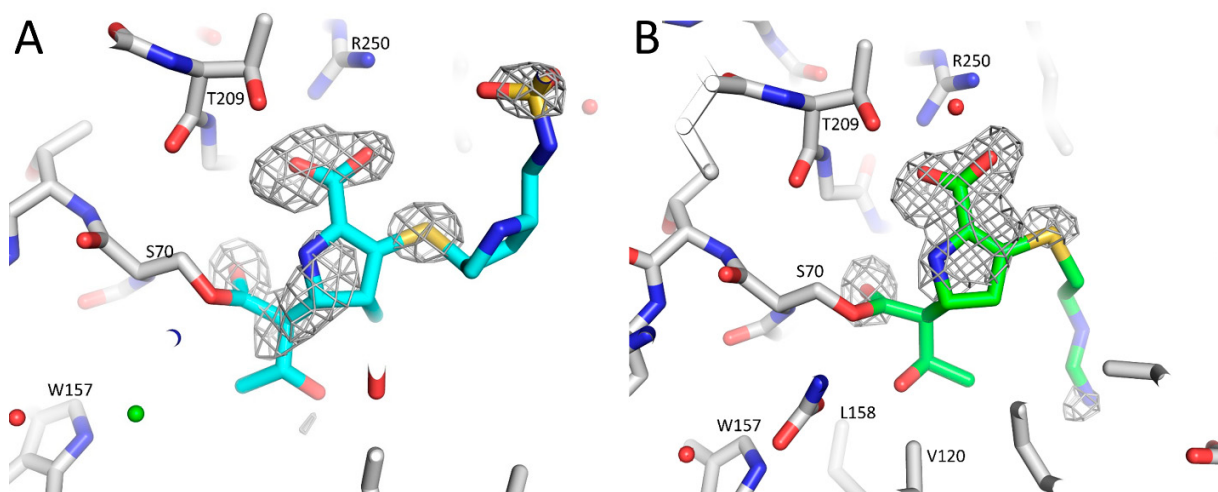

**Figure S1.** Electron density maps of the active sites of wild-type OXA-48 with doripenem and imipenem bound. To remove ligand bias prior to the map calculation, a 10-cycle refmac crystallographic refinement was carried out with the ligands removed from the coordinates. (A) Unbiased |Fo|-|Fc| Polder omit map of the active site of wild-type OXA-48 showing a poorly ordered doripenem molecule (PDBid = 6P9C molecule A; density contoured at 3  $\sigma$ ). The doripenem ligand was added back to the coordinates prior to the map calculation to allow Polder to adjust the solvent mask. A regular unbiased omit map showed similar results. (B) Unbiased |Fo|-|Fc| omit map of the active site of wild-type OXA-48 showing a poorly ordered imipenem molecule (PDBid = 5QB4 molecule A; density contoured at 3  $\sigma$ ). Electron density in the other molecules in the asymmetric units was equal or worse than the depicted doripenem and imipenem density.

CLUSTAL O(1.2.4) multiple sequence alignment

```

OXA-1      MKNTIHHNFAIFLIIANIIYSSASASTDI-----STVASPLFE--GTEGCF      44
OXA-48     MRV-----LALS-AVFLVASI-----IGMPAVAKEWQENKSWNAHFTEHKSQGVV      44
OXA-23     MNKY--F---TCYVVA-SLFLSGCTVQHNLINETP-SQIVQGHNQVIHQYFDEKNTSGVL      53
OXA-24/40  MKKFILEP---IFSISI-LVSLSACSSIKTKSEDNF-HISSQQHEKAIKSYFDEAQTQGVV      55
OXA-51     --MNIKT---LLLITS-AIFISACSPYIVTANPNHSASKSDEKAEEKIKNLFNEVHTTGVL      54
           :      ..                               *      : * .

OXA-1      LLYDASTNAEIAQFNKAKCATQMAPDSTFKIALSLMAFDAEI-IDQKTIKWDKTPKGM      103
OXA-48     VLWNEN-KQQGFTNNLKRAQFLPASTFKIPNSLIALDLGVVKDEHQVFKWDGQTRDIA      103
OXA-23     VIQTDK-KINLYGNALS RANTEYVPASTFKMLNALIGLENQK-TDINEIFKWKGEKRSFT      111
OXA-24/40  IIEGK-NLSTYGNALARANKEYVPASTFKMLNALIGLENHK-ATTNEIFKWDGKKRTYP      113
OXA-51     VIQQGQ-TQSSYGNDLARASTEYVPASTFKMLNALIGLEHHK-ATTTEVFKWDGQKRLFP      112
           ::      . . .      :      *      * * * * :      : * : : :      : * * * .      :

OXA-1      IWNSNHTPKTWMQFVVVWSQEITQKIGLNKIKNYLKDFDYGNDQDFSGDKERNNGLTEAW      163
OXA-48     TWNRDHNLITAMKYSVVPVYQEFARQIGEARMSKMLHAFDYGNEIDSGN-----VDSFW      157
OXA-23     AWEKDMTLGEAMKLSAVPVYQELARRIGLDLMQKEVKRIGFGNAEIGQQ-----VDNFW      165
OXA-24/40  MWEKDMTLGEAMLSAVPVYQELARRTGLELMQKEVKRVNFGNTNIGTQ-----VDNFW      167
OXA-51     EWEKDMTLGDAMKASAIIPVYQDLARRIGLELMSKEVKRVGYGNADIGTQ-----VDNFW      166
           * : : .      *      * : * * : : : *      : : : : . . * * : : . :      : . *

OXA-1      LESSLKISP EEGIQLRKIINHNLFPVKN SAIENT IENMYLQDLDNSTKLYGKTGAGFTAN      223
OXA-48     LDGGIRISATEQISFLRKLYHNKLHV SERSQ-RIVKQAMLTEANGDYIIRAKTG YSTR--      214
OXA-23     LVGPLKVTPIQEVFVSQLAHTQLPFS EK VQ-ANVKNMLLLEESNGYKIFGKTGWAMD--      222
OXA-24/40  LVGPLKITPVQEVNFADDLAHLNRLPFFKLETQ-EEVKKMLLIKEVNGSKIIYAKSGWGMG--      224
OXA-51     LVGPLKITPQQAQFAYKLANKTLPFSPKVQ-DEVQSMLEEKNGNKKIYAKSGWGWD--      223
           * . : : : : : : . *      . : : *      . : : . . . : . * : * .

OXA-1      RTLQNGWFEGFIISKSGHKYV FVSALTGNLGSNLTSSIKAKKNAITILNTLNL--      276
OXA-48     IEPKIGWVVGWVELDD-NVWFFAMNMDMPTSD--GLGLRQAI-TKEVLKQEKIIP      265
OXA-23     IKPQVGWLTGWVEQPDGKIVAFALNMEMRSEM--PASIRNEL-LMKSLKQLNII-      273
OXA-24/40  VTPQVGWLTGWVEQANGKKIPFSLNLEMKEGM--SGSIRNEI-TYKSLENLGII-      275
OXA-51     VDPQVGWLTGWVVPQGNIVAFSLNLEMKKGI--PSSVRKEI-TYKSLEQLGIL-      274
           : * *      * : : . :      *      :      : : :      * :      :

```

**Figure S2.** Multiple sequence alignment using Clustal  $\Omega$  using wild-type enzymes of OXA-1, OXA-23, OXA-24/40, OXA-48, and OXA-51. The catalytic serine and carboxylated lysine residues encompassing the STFK motif are highlighted by the yellow box. The S-A/V-V/I motif is represented by the green box and the K-T/S-G motif is highlighted in blue.
